# Supplementary material
Source: PubMed Central journal article supplement (PMC6440792)
Supplement: JCM.01619-18-s0001.pdf [file JCM.01619-18-s0001.pdf]

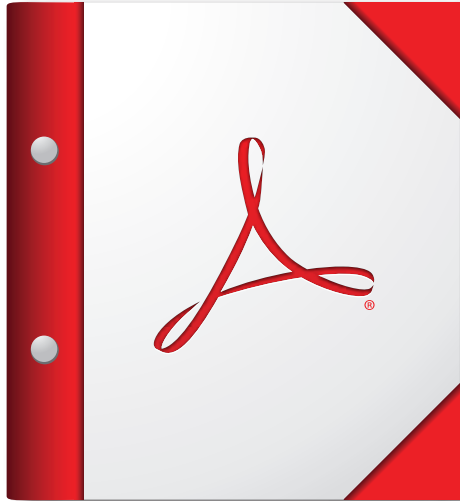

**For the best experience, open this PDF portfolio in  
Acrobat X or Adobe Reader X, or later.**

[Get Adobe Reader Now!](#)
